# Supplementary material
Source: PubMed Central journal article supplement (PMC2747833)
Supplement: supp_8_9_1407__1.pdf [file supp_8_9_1407__1.pdf]

# Supplementary Data

## **The fate of GPI-less procyclin and characterisation of sialylated non-GPI anchored surface coat molecules of procyclic form *Trypanosoma brucei***

Maria Lucia Sampaio Güther<sup>1</sup>, Kenneth Beattie<sup>2</sup>, Douglas J. Lamont<sup>2</sup>, John  
James<sup>3</sup>, Alan R. Prescott<sup>4</sup> and Michael A.J. Ferguson<sup>1,\*</sup>

<sup>1</sup>Division of Biological Chemistry and Drug Discovery, <sup>2</sup>FingerPrints Proteomics  
Facility, <sup>3</sup>Centre for High-Resolution Imaging and <sup>4</sup>Division of Cell Biology and  
Immunology, College of Life Sciences, University of Dundee, Dundee DD1 5EH,  
UK

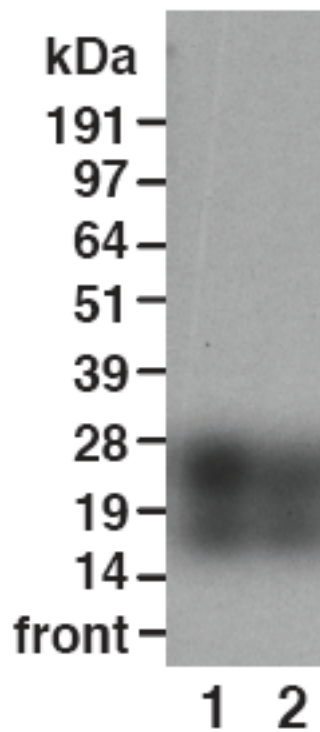

**Figure S1: Procyclin precursor degradation is partially inhibited by FMK24.** *TbGPI12* null cells ( $5 \times 10^6$ ) were pre-treated with 20  $\mu$ M FMK024 (lane 1) or with DMSO control (lane 2) for 30 min at 28°C and metabolically labelled with 10  $\mu$ Ci/ml [ $^{14}$ C]proline for 20 h at 28 °C. The culture supernatants were immunoprecipitated with 5  $\mu$ g anti-EP procyclin and 20  $\mu$ g protein G-agarose (Pierce) for 2 h at 4°C, washed and subsequently analysed by SDS-PAGE and fluorography. Molecular weight standards are shown on the left.

Note the accumulation of the 26-28 kDa procyclin fragments (upper band) in the FMK24 treated cells (lane 1) relative to the control cells (lane 2).

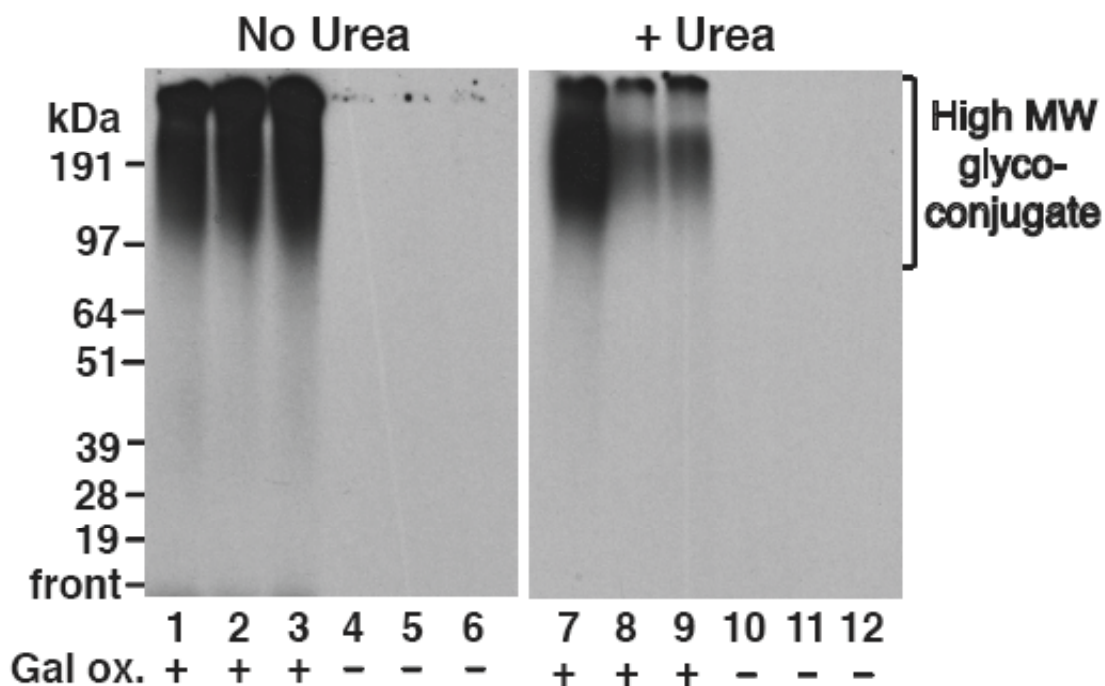

**Figure S2: The appearance of the high MW glycoconjugate under different extraction conditions.** *TbGPI12* null cells were labelled *in vivo* with  $\text{NaB}^3\text{H}_4$  before (-) and after (+) treatment with galactose oxidase (Gal ox.), as described in Materials and Methods, lysed in SDS-sample buffer with 0.1M DTT with (lanes 7 to 12) or without (lanes 1 to 6) 4 M urea and heated to 100 °C (lanes 1, 4, 7 and 10), 50 °C (lanes 2, 5, 8 and 11) or 37°C (lanes 3, 6, 9 and 12). The samples were analysed by SDS-PAGE and fluorography. Molecular weight standards are shown on the left.

Note (a) the absence of temperature effect for the extractions without urea (lanes 1-3), (b) the higher efficiency of extraction at 100°C, versus 59°C and 37°C, in the presence of 4 M urea and (c) the greater dissociation of very high molecular weight material in the presence of 4 M urea (compare lanes 1-3 with lanes 7-9).
